# Supplementary material for: Identification of graphene oxide and its structural features in solvents by optical microscopy
Source: Royal Society of Chemistry journal article supplement (doi:10.1039/c9ra02076d), 2019-01-01
Supplement: c9ra02076d1.pdf [file c9ra02076d1.pdf]

ARTICLE

## Supporting Information

For

### Identification of Graphene Oxide and its Structure Features in Solvent Enabled by Optical Microscopy

Huailiang Xu,<sup>‡a,b</sup> Zhikai Qi,<sup>‡a</sup> Hongchang Jin,<sup>a</sup> Jinxi Wang,<sup>a</sup> Yan Qu,<sup>b</sup> Yanwu Zhu<sup>c</sup> and Hengxing Ji<sup>\*a</sup>

<sup>a</sup> Hefei National Laboratory for Physical Sciences at the Microscale, Department of Applied Chemistry, CAS Key Laboratory of Materials for Energy Conversion, iChEM (Collaborative Innovation Center of Chemistry for Energy Materials), University of Science and Technology of China. Hefei 230026, P. R. China. Email: jihengx@ustc.edu.cn  
Tel: +86-551-63607290

<sup>b</sup> The Sixth Element (Changzhou) Materials Technology Co., Ltd. Changzhou 213000, P. R. China.

<sup>c</sup> Department of Materials Science and Engineering, CAS Key Laboratory of Materials for Energy Conversion, iChEM (Collaborative Innovation Center of Chemistry for Energy Materials), University of Science and Technology of China

<sup>‡</sup> These authors contributed equally to this work.

Received 18th March 2019

Accepted xxth xx 20xx

## Addition Figures

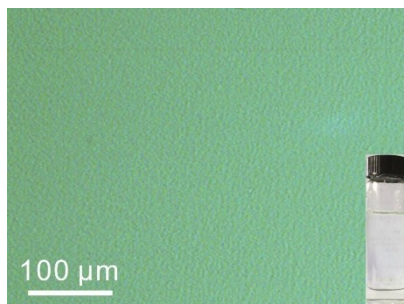

**Fig. S1** OM image of pure water solution. Inset: Photograph of pure water solution.

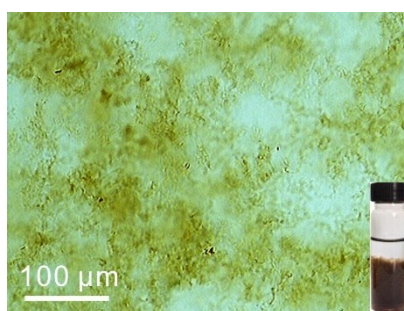

**Fig. S2** OM image of GO solution with the concentration of  $0.1 \text{ mg}\cdot\text{mL}^{-1}$  at pH of 12.66. Inset: Photograph of GO solution standing 24 h.

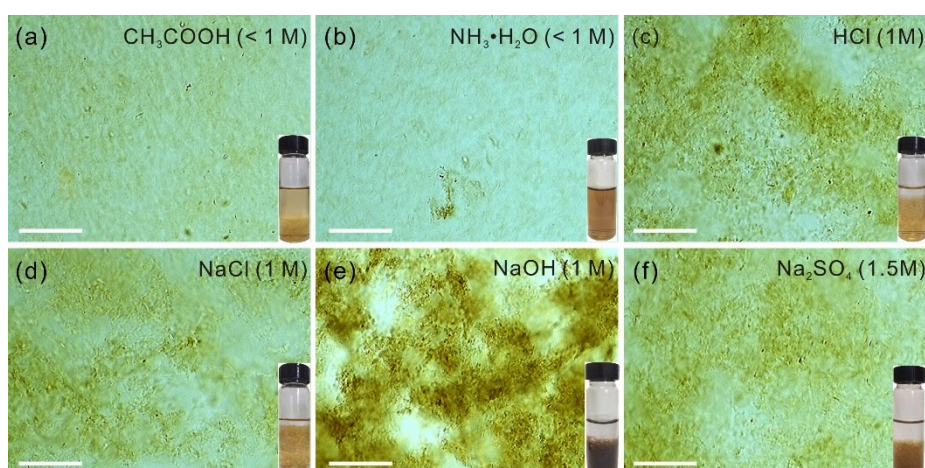

**Fig. S3** OM images of different ionic strength of GO solution, Insets: Photographs of GO dispersed in different ionic strength solutions standing 12 h. Scale bars: 100 μm.

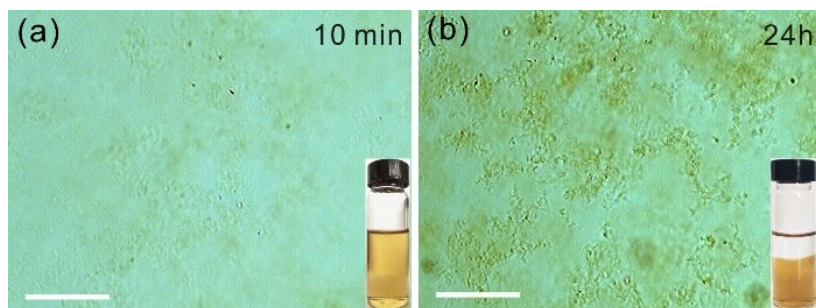

**Fig. S4** (a) (b) OM images of GO suspensions of  $0.1 \text{ mg mL}^{-1}$  at pH of 0.94. Insets: Photographs GO suspension in water of different standing times. Scale bars:  $100 \mu\text{m}$ .

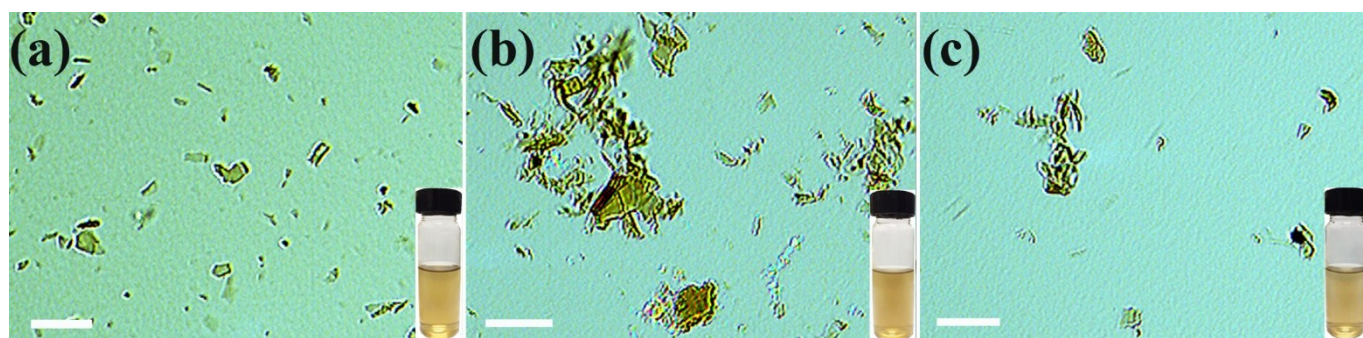

**Fig.S5** OM images of different solvents of GO solution. The GO solutions of  $0.1 \text{ mg mL}^{-1}$ . (a) DMF, (b) ethyl alcohol, (c) ethyl acetate. Scale bars:  $100 \mu\text{m}$ .

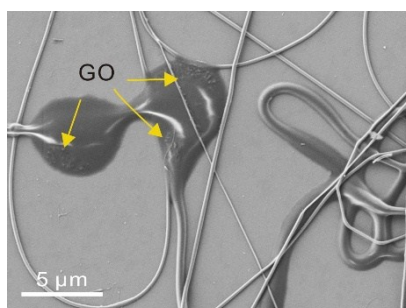

**Fig. S6** SEM image of the  $0.16\text{-GO/PVA}$  ( $0.16 \text{ mg mL}^{-1}$ ) fibers.
